# Supplementary material for: Diverse lineages of pathogenic Leptospira species are widespread in the environment in Puerto Rico, USA
Source: PubMed Central journal article supplement (PMC9154103; doi:10.1371/journal.pntd.0009959), 2022-05-18

✦ Soil Sample

✦ Water Sample

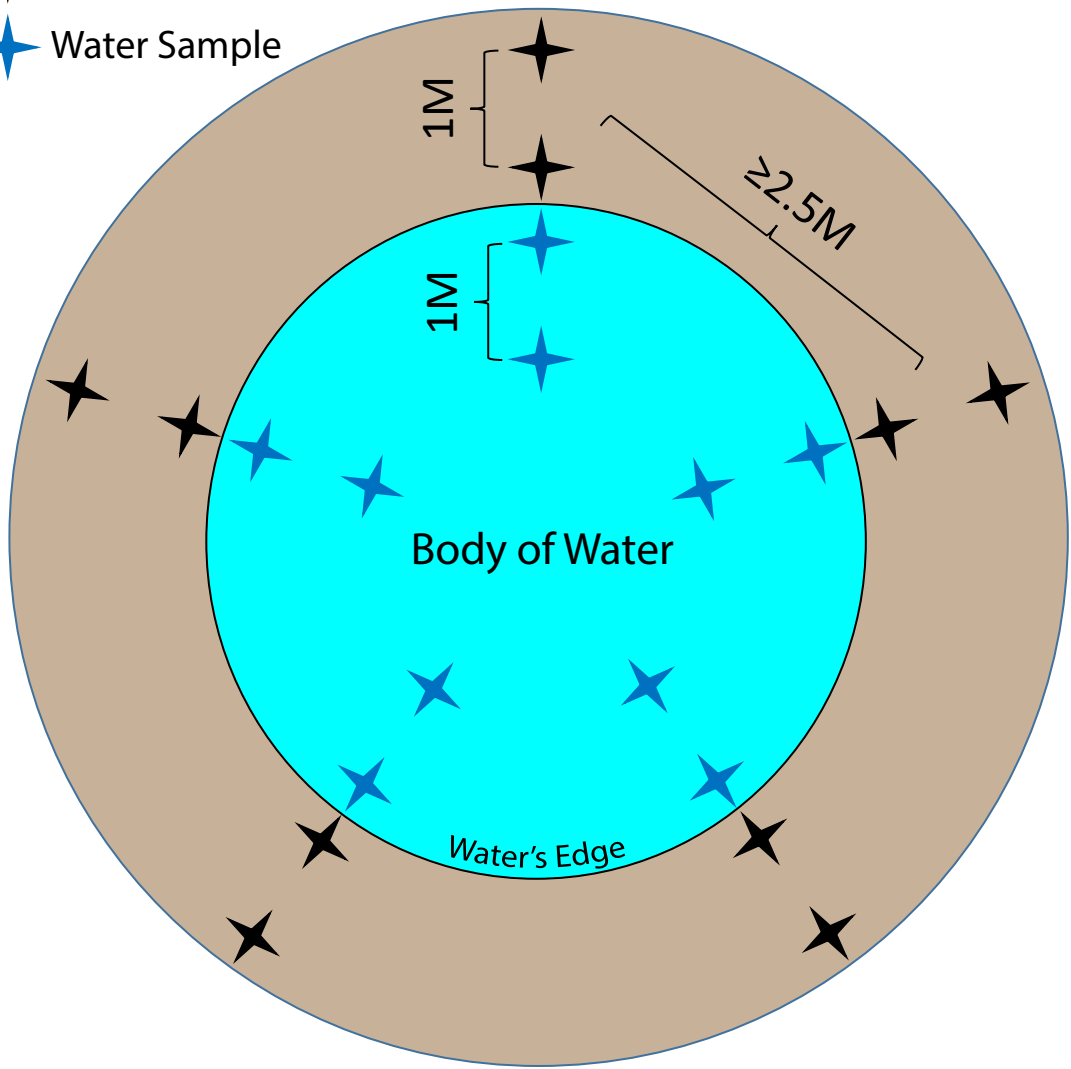

Supplement: pntd.0009959.s001.pdf [file pntd.0009959.s001.pdf]
