# Supplementary material for: Diverse lineages of pathogenic Leptospira species are widespread in the environment in Puerto Rico, USA
Source: PubMed Central journal article supplement (PMC9154103; doi:10.1371/journal.pntd.0009959), 2022-05-18

A

● Soil (n=10) sampling site

● Water (n=10) sampling site

▲ *LipL32* Assay positive site: pathogenic *Leptospira* DNA detected

● Serially sampled soil site

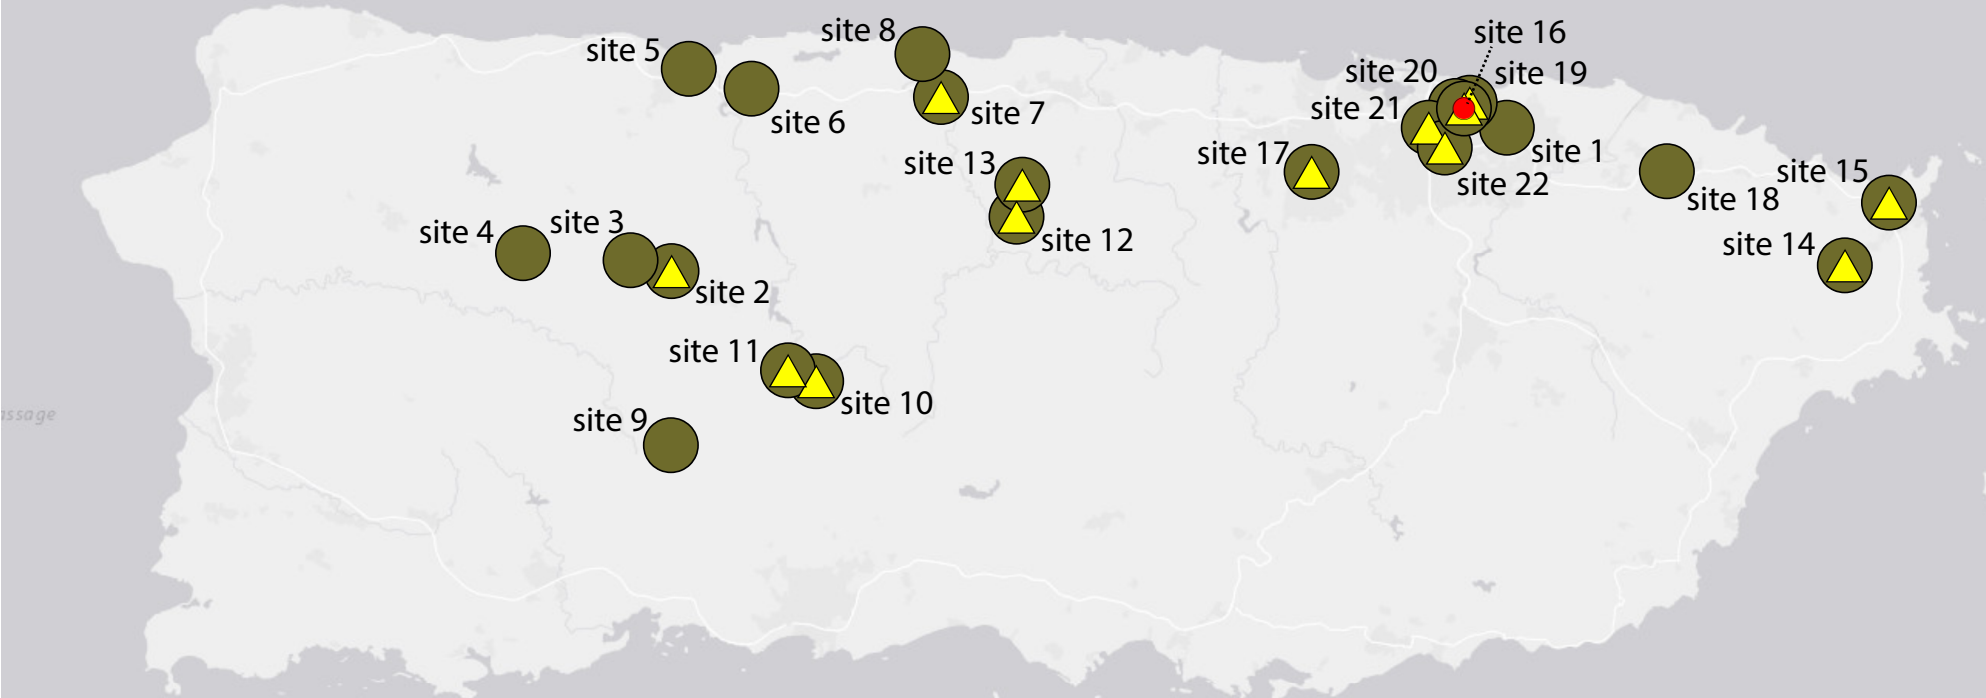

B

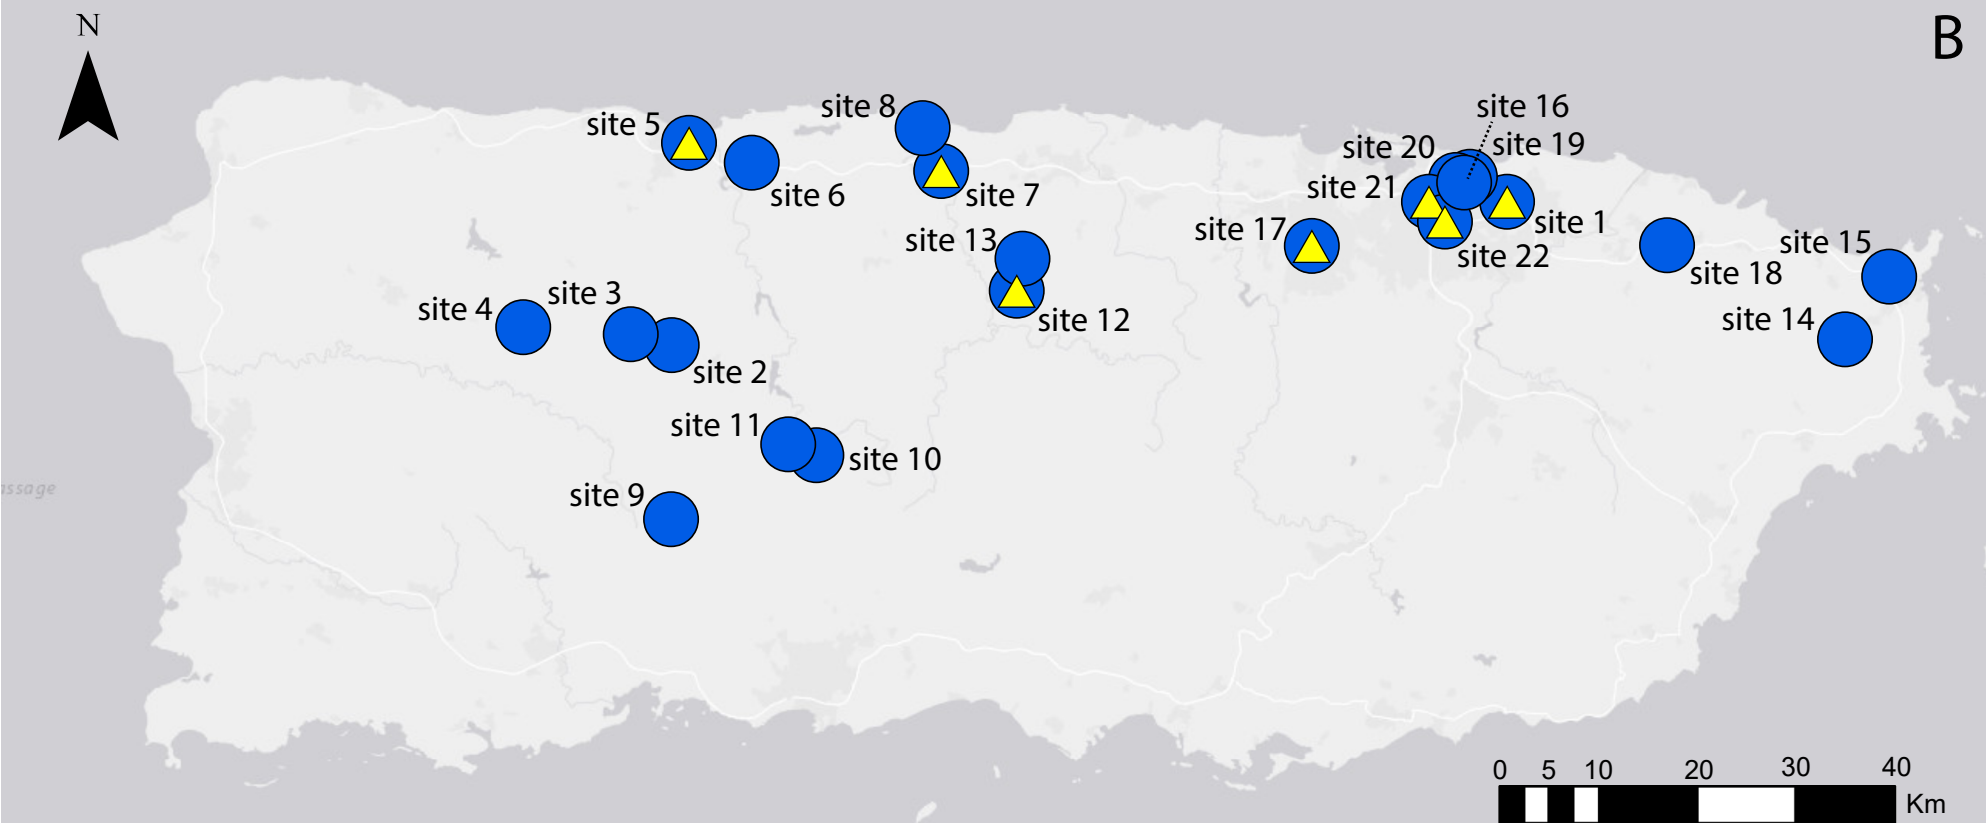

Supplement: pntd.0009959.s002.pdf [file pntd.0009959.s002.pdf]
