# Supplementary material for: Diverse lineages of pathogenic Leptospira species are widespread in the environment in Puerto Rico, USA
Source: PubMed Central journal article supplement (PMC9154103; doi:10.1371/journal.pntd.0009959), 2022-05-18
Supplement: pntd.0009959.s003.pdf [file pntd.0009959.s003.pdf]

Water  
Soil

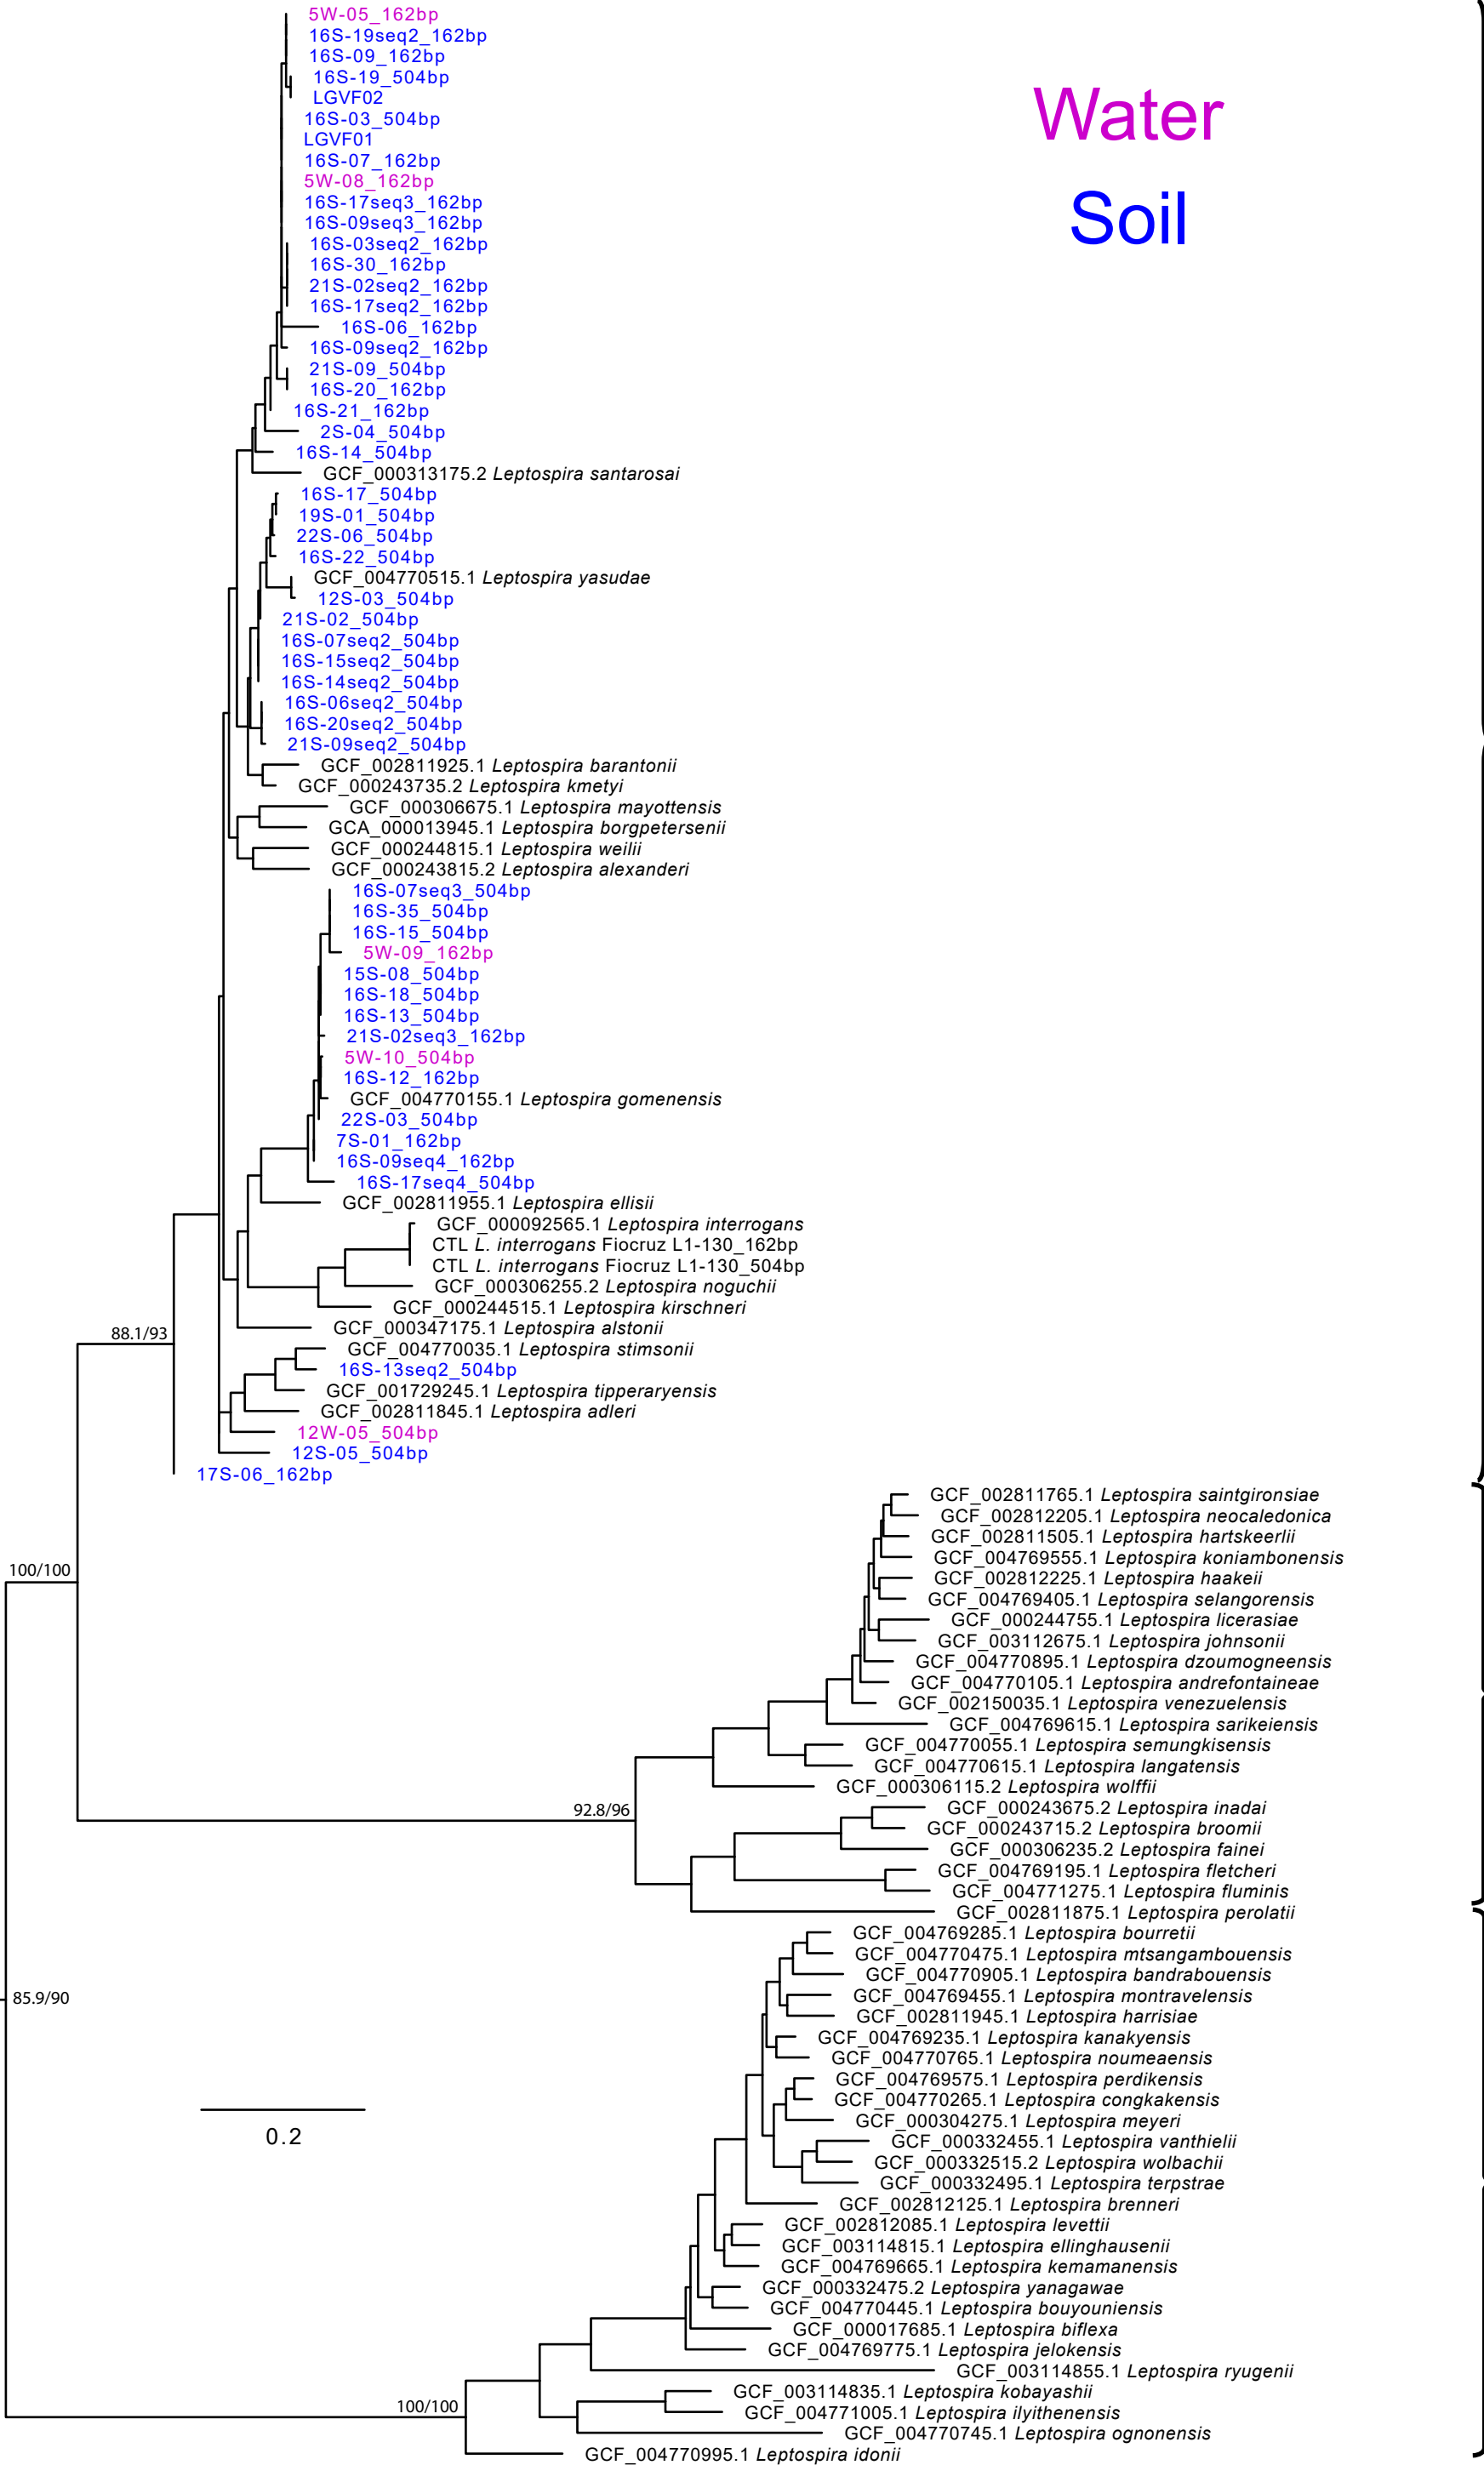

Pathogenic

Intermediate

Saprophytic

0.2

88.1/93

100/100

85.9/90

92.8/96

100/100

- 5W-05\_162bp
- 16S-19seq2\_162bp
- 16S-09\_162bp
- 16S-19\_504bp
- LGVF02
- 16S-03\_504bp
- LGVF01
- 16S-07\_162bp
- 5W-08\_162bp
- 16S-17seq3\_162bp
- 16S-09seq3\_162bp
- 16S-03seq2\_162bp
- 16S-30\_162bp
- 21S-02seq2\_162bp
- 16S-17seq2\_162bp
- 16S-06\_162bp
- 16S-09seq2\_162bp
- 21S-09\_504bp
- 16S-20\_162bp
- 16S-21\_162bp
- 2S-04\_504bp
- 16S-14\_504bp
- GCF\_000313175.2 *Leptospira santarosai*
- 16S-17\_504bp
- 19S-01\_504bp
- 22S-06\_504bp
- 16S-22\_504bp
- GCF\_004770515.1 *Leptospira yasudae*
- 12S-03\_504bp
- 21S-02\_504bp
- 16S-07seq2\_504bp
- 16S-15seq2\_504bp
- 16S-14seq2\_504bp
- 16S-06seq2\_504bp
- 16S-20seq2\_504bp
- 21S-09seq2\_504bp
- GCF\_002811925.1 *Leptospira barantonii*
- GCF\_000243735.2 *Leptospira kmetyi*
- GCF\_000306675.1 *Leptospira mayottensis*
- GCA\_000013945.1 *Leptospira borgpetersenii*
- GCF\_000244815.1 *Leptospira weilii*
- GCF\_000243815.2 *Leptospira alexanderi*
- 16S-07seq3\_504bp
- 16S-35\_504bp
- 16S-15\_504bp
- 5W-09\_162bp
- 15S-08\_504bp
- 16S-18\_504bp
- 16S-13\_504bp
- 21S-02seq3\_162bp
- 5W-10\_504bp
- 16S-12\_162bp
- GCF\_004770155.1 *Leptospira gomenensis*
- 22S-03\_504bp
- 7S-01\_162bp
- 16S-09seq4\_162bp
- 16S-17seq4\_504bp
- GCF\_002811955.1 *Leptospira ellisii*
- GCF\_000092565.1 *Leptospira interrogans*
- CTL *L. interrogans* Fiocruz L1-130\_162bp
- CTL *L. interrogans* Fiocruz L1-130\_504bp
- GCF\_000306255.2 *Leptospira noguchii*
- GCF\_000244515.1 *Leptospira kirschneri*
- GCF\_000347175.1 *Leptospira alstonii*
- GCF\_004770035.1 *Leptospira stimsonii*
- 16S-13seq2\_504bp
- GCF\_001729245.1 *Leptospira tipperaryensis*
- GCF\_002811845.1 *Leptospira adleri*
- 12W-05\_504bp
- 12S-05\_504bp
- 17S-06\_162bp

- GCF\_002811765.1 *Leptospira saintgironsiae*
- GCF\_002812205.1 *Leptospira neocaledonica*
- GCF\_002811505.1 *Leptospira hartskeerlii*
- GCF\_004769555.1 *Leptospira koniambonensis*
- GCF\_002812225.1 *Leptospira haakeii*
- GCF\_004769405.1 *Leptospira selangorensis*
- GCF\_000244755.1 *Leptospira licerasiae*
- GCF\_003112675.1 *Leptospira johnsonii*
- GCF\_004770895.1 *Leptospira dzoumogneensis*
- GCF\_004770105.1 *Leptospira andrefontaineae*
- GCF\_002150035.1 *Leptospira venezuelensis*
- GCF\_004769615.1 *Leptospira sarikeiensis*
- GCF\_004770055.1 *Leptospira semungkisensis*
- GCF\_004770615.1 *Leptospira langatensis*
- GCF\_000306115.2 *Leptospira wolffii*
- GCF\_000243675.2 *Leptospira inadai*
- GCF\_000243715.2 *Leptospira broomii*
- GCF\_000306235.2 *Leptospira fainei*
- GCF\_004769195.1 *Leptospira fletcheri*
- GCF\_004771275.1 *Leptospira fluminis*
- GCF\_002811875.1 *Leptospira perolatii*
- GCF\_004769285.1 *Leptospira bourretii*
- GCF\_004770475.1 *Leptospira mtsangambuensis*
- GCF\_004770905.1 *Leptospira bandrabouensis*
- GCF\_004769455.1 *Leptospira montravelensis*
- GCF\_002811945.1 *Leptospira harrisiae*
- GCF\_004769235.1 *Leptospira kanakyensis*
- GCF\_004770765.1 *Leptospira noumeaensis*
- GCF\_004769575.1 *Leptospira perdikensis*
- GCF\_004770265.1 *Leptospira congkakensis*
- GCF\_000304275.1 *Leptospira meyeri*
- GCF\_000332455.1 *Leptospira vanthielii*
- GCF\_000332515.2 *Leptospira wolbachii*
- GCF\_000332495.1 *Leptospira terpstrae*
- GCF\_002812125.1 *Leptospira brenneri*
- GCF\_002812085.1 *Leptospira levettii*
- GCF\_003114815.1 *Leptospira ellinghausenii*
- GCF\_004769665.1 *Leptospira kemamanensis*
- GCF\_000332475.2 *Leptospira yanagawae*
- GCF\_004770445.1 *Leptospira bouyouniensis*
- GCF\_000017685.1 *Leptospira biflexa*
- GCF\_004769775.1 *Leptospira jelokensis*
- GCF\_003114855.1 *Leptospira ryugenii*
- GCF\_003114835.1 *Leptospira kobayashii*
- GCF\_004771005.1 *Leptospira ilyithenensis*
- GCF\_004770745.1 *Leptospira ognonensis*
- GCF\_004770995.1 *Leptospira idonii*
